# Supplementary material for: High-Reynolds Microfluidic Sorting of Large Yeast Populations
Source: Springer Nature journal article supplement (doi:10.1038/s41598-018-31726-6), 2018-09-07
Supplement: MOESM1 [file 41598_2018_31726_MOESM1_ESM.pdf]

## High-Reynolds Microfluidic Sorting of Large Yeast Populations

Eliezer Keinan<sup>1</sup>, Ayelet Chen Abraham<sup>2</sup>, Aaron Cohen<sup>1</sup>, Alexander I. Alexandrov<sup>2,4</sup>, Reshef Mintz<sup>3</sup>, Merav Cohen<sup>1,2</sup>, Dana Reichmann<sup>3</sup>, Daniel Kaganovich<sup>2,\*</sup>, Yaakov Nahmias<sup>1,2,\*</sup>

1. *Alexander Grass Center for Bioengineering, Benin School of Computer Science and Engineering, The Hebrew University of Jerusalem, Jerusalem, ISRAEL*
2. *Department of Cell and Developmental Biology, Silberman Institute of Life Sciences, The Hebrew University of Jerusalem, Jerusalem, ISRAEL*
3. *Department of Biological Chemistry, Silberman Institute of Life Sciences, The Hebrew University of Jerusalem, Jerusalem, ISRAEL*
4. *Current address: Fundamentals of Biotechnology Federal Research Center of the Russian Academy of Sciences, Bach Institute of Biochemistry RAS*

\* Correspondence should be addressed to:

Yaakov Nahmias: [ynahmias@cs.huji.ac.il](mailto:ynahmias@cs.huji.ac.il)

Daniel Kaganovich: [dan@cc.huji.ac.il](mailto:dan@cc.huji.ac.il)

### Supporting Information

**Figure S1.** Proteomic analysis of three sample sets, young, adult and mix. **(A)** clustering analysis of all 932 proteins identified in this analysis. Clustering done on median LFQ intensity values using the Perseus software<sup>52</sup>. **(B)** Clustering analysis of significantly different proteins identified by the ANOVA test (P-value <0.05). The LFQ values were normalized using z-scoring ranging from -2 (low LFQ intensity) to 1.8 (high LFQ intensity).

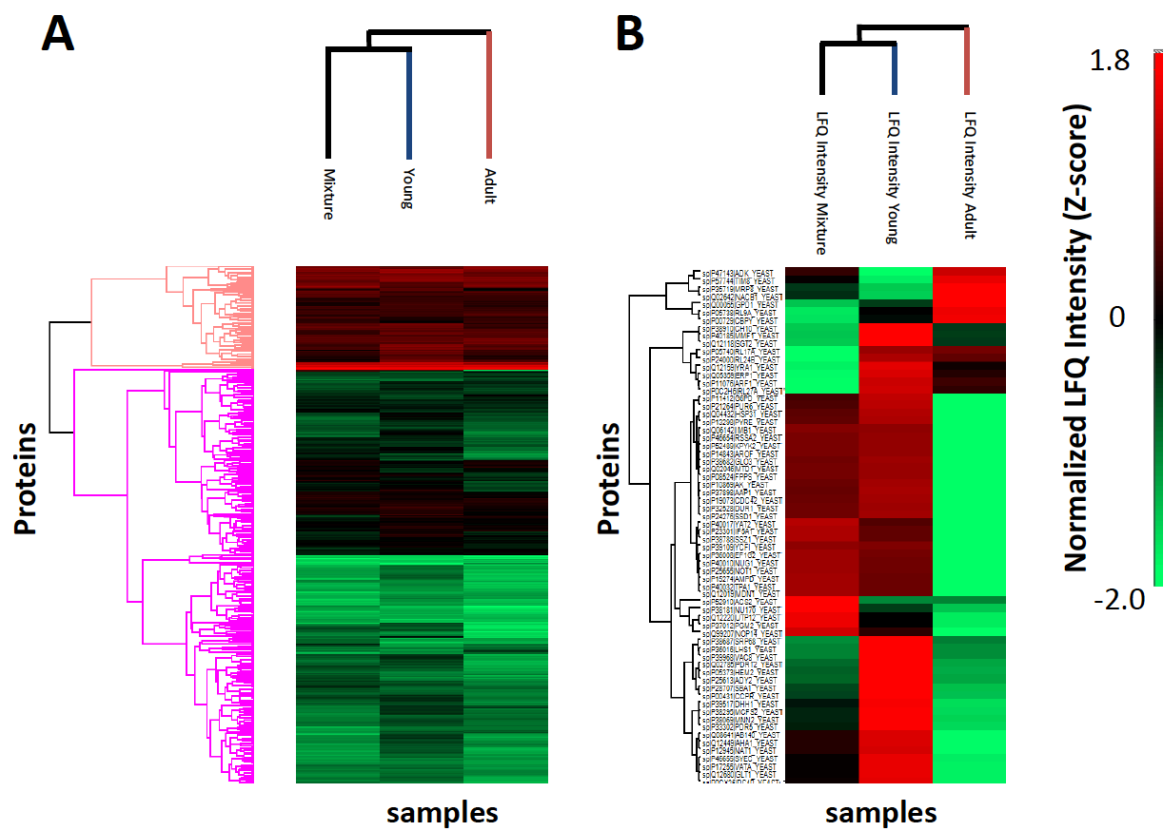

**Table S1.** Proteins which are present in all yeast groups: young (0-2 scars), adult (3-10 scars) and heterogeneous mixture.

**Table S2.** The cellular distribution of the proteins according to GO based cellular localization.

**Table S3.** ANOVA test which identifies a subset of 64 proteins showing significantly different expression levels between all three yeast groups: young (0-2 scars), adult (3-10 scars) and heterogeneous mixture.

**Table S4.** Distribution of biological functions within the group of significantly different proteins.
